## **A counterselectable sucrose sensitivity marker permits efficient and flexible mutagenesis in**

### ***Streptococcus agalactiae***

Thomas A. Hooven<sup>a</sup>, Maryam Bonakdar<sup>b</sup>, Anna B. Chamby<sup>c</sup>, Adam J. Ratner<sup>c,d\*</sup>

#### Affiliations:

- a. Columbia University Vagelos College of Physicians and Surgeons, Department of Pediatrics,  
New York, NY
- b. Brown University, Pathobiology Graduate Program, Providence, RI
- c. New York University School of Medicine, Department of Pediatrics, New York, NY
- d. New York University School of Medicine, Department of Microbiology, New York, NY

\* Corresponding author: Adam J. Ratner  
Departments of Pediatrics and Microbiology  
Division of Pediatric Infectious Diseases  
New York University School of Medicine  
430 East 29th Street, Room 505  
New York, NY 10016  
Tel: (646) 501-0044  
Adam.Ratner@nyulangone.org

Running title: Rapid GBS mutagenesis with sucrose counterselection

1 Abstract

2

3 *Streptococcus agalactiae* (group B *Streptococcus*; GBS) is a cause of severe infections,  
4 particularly during the newborn period. While methods exist for generating chromosomal  
5 mutations in GBS, they are cumbersome and inefficient and present significant challenges if the  
6 goal is to study subtle mutations such as single base pair polymorphisms. To address this  
7 problem, we have developed an efficient and flexible GBS mutagenesis protocol based on  
8 sucrose counterselection against levansucrase (SacB) expressed from a temperature-selective  
9 shuttle vector. GBS containing the SacB expression cassette demonstrate lethal sensitivity to  
10 supplemental sucrose whether the plasmid DNA is replicating outside of the chromosome or  
11 has been integrated during a crossover event. Transmission electron microscopy shows that  
12 SacB-mediated lethal sucrose sensitivity results from accumulation of inclusion bodies that  
13 eventually lead to complete degradation of normal cellular architecture and subsequent lysis.  
14 We used this new mutagenesis technique to generate an in-frame, allelic exchange knockout of  
15 the GBS sortase gene *srtA*, demonstrating that >99% of colonies that emerge from our protocol  
16 had the expected knockout phenotype and that among a subset tested by sequencing, 100%  
17 had the correct genotype. We also generated barcoded nonsense mutations in the *cyfE* gene in  
18 two GBS strains, showing that the approach can be used to make small, precise chromosomal  
19 mutations.

20

21

22

23

24 Importance

25

26 The ability to generate chromosomal mutations is fundamental to microbiology. Historically,  
27 however, GBS pathogenesis research has been made challenging by the relative genetic  
28 intractability of the organism. Generating a single knockout in GBS using traditional techniques  
29 can take many months, with highly variable success rates. Furthermore, traditional methods do  
30 not offer a straightforward way to generate single base pair polymorphisms or other subtle  
31 changes, especially to noncoding regions of the chromosome. We have developed a new  
32 sucrose counterselection-based method that permits rapid, efficient, and flexible GBS  
33 mutagenesis. Our technique requires no additional equipment beyond what is needed for  
34 traditional approaches. We believe that it will catalyze rapid advances in GBS genetics research  
35 by significantly easing the path to generating mutants.

36

37 Introduction

38

39 *Streptococcus agalactiae* (group B *Streptococcus*; GBS) is the most common cause of neonatal  
40 sepsis and meningitis (1-3). It can also cause serious infections in adults (4, 5) and in several  
41 animal species, including fish, which can be a source of zoonotic transmission (6-9).

42

43 GBS is not naturally competent under laboratory conditions (10) and exhibits low rates of  
44 spontaneous genetic recombination (11). Genetic studies of GBS have mostly relied on

45 generation of allelic exchange knockouts using mutagenesis cassettes cloned into a  
46 temperature-sensitive shuttle vector (12-14). The mutagenesis cassette typically consists of an  
47 antibiotic resistance marker with upstream and downstream homology arms matching the  
48 chromosomal regions adjacent to the target gene. A second antibiotic resistance marker on the  
49 plasmid, outside of the mutagenesis cassette, confers dual resistance to transformed cells.

50

51 After electroporation and transformation of competent GBS with the mutagenesis vector,  
52 transformed clones are initially grown at a permissive temperature, which allows  
53 extrachromosomal replication of the plasmid. A subsequent shift to a higher, non-permissive  
54 temperature selects against extrachromosomal plasmid replication, leaving only cells where a  
55 crossover event at one of the homology arms has resulted in plasmid integration into the  
56 chromosome.

57

58 In order to achieve allelic exchange, a second crossover event must then occur at the other  
59 homology arm, followed by plasmid expulsion from the cell. Successful completion of these  
60 steps is detected by screening individual colonies for a specific antibiotic resistance phenotype:  
61 retained antibiotic resistance from the mutagenesis cassette marker with sensitivity to the  
62 second antibiotic due to loss of the plasmid during growth at the non-permissive temperature  
63 (12).

64

65 Without effective counterselection against the plasmid, however, detection of the second  
66 crossover event—a stochastic and often rare occurrence—is inefficient. Particularly if the

67 desired mutant has a fitness disadvantage compared to wild type, identification of an allelic  
68 exchange mutant may require manual screening of hundreds or thousands of individual  
69 colonies (15).

70

71 Furthermore, the existing approach limits the types of mutants that can be generated. Since the  
72 final screen depends on persistence of one antibiotic resistance phenotype with loss of a  
73 second, mutants produced using traditional techniques must include an antibiotic resistance  
74 marker on the chromosome. Small-scale and unmarked alterations, such as single nucleotide  
75 polymorphisms (SNP) or subtle mutations to noncoding regions, are very difficult to obtain.

76

77 Levansucrase (sucrose: 2,6- $\beta$ -D-fructan 2,6- $\beta$ -D-fructosyltransferase) is an enzyme present in  
78 multiple bacterial species and has been extensively studied in *Bacillus subtilis* (16-21). Encoded  
79 by the *sacB* gene, secreted *B. subtilis* levansucrase polymerizes sucrose into the branched  
80 fructan polymer known as levan (16, 19). While the exact function of levansucrase in *B. subtilis*  
81 is unknown, the levan that it generates is believed to serve a structural or nutrient role for the  
82 cell (17).

83

84 In other bacterial species, expression of *B. subtilis* *sacB* confers lethal sensitivity to sucrose (22,  
85 23). The mechanism of sucrose toxicity is believed to be from either intracellular or extracellular  
86 accumulation of levan, with resultant disruption of normal cellular processes. Sucrose  
87 sensitivity from *sacB* expression has been used as counterselection in conjunction with plasmid-

88 based mutagenesis systems to isolate mutants in several bacterial species (22, 23). To date,  
89 however, the technique has not been described in GBS.

90

91 Here we report development and validation of a flexible and efficient counterselection system  
92 to make targeted mutations in GBS using a *sacB*-containing, temperature sensitive, broad host  
93 range plasmid. A schematic of this new system is presented in **Figure 1**. We show that the  
94 system can be used to generate marked and unmarked mutations in multiple GBS strains. In our  
95 experience, use of this technique dramatically decreases the labor and time required to  
96 generate mutants, allowing accelerated discovery.

97

## 98 Results

99

### 100 *Construction of pMBsacB, a temperature-sensitive, sucrose counterselectable mutagenesis* 101 *shuttle vector*

102

103 Plasmid pMBsacB is derived from pHY304, a widely used mutagenesis shuttle vector with the  
104 temperature-sensitive broad host range origin of replication from pWV01 (12, 24).

105

106 The *B. subtilis sacB* coding sequence, complete with signal peptide sequence, was amplified  
107 from strain 168 purified genomic DNA and cloned into plasmid pOri23, which placed the *sacB*  
108 gene downstream of the p23 promoter. This plasmid is designated pSacB23, and was used in  
109 initial experiments to test *sacB* functionality in GBS (see next section).

110

111 We subsequently generated pMBsacB by amplifying the p23 promoter and *sacB* coding  
112 sequence as a single expression cassette then subcloning it into pHY304. **Figure 2** shows the  
113 steps involved in developing pMBsacB.

114

115 *GBS transformed with sacB-bearing plasmids show lethal sucrose sensitivity*

116

117 Before transforming GBS with *sacB*-bearing plasmids pSacB23 and pMBsacB, we developed an  
118 electroporation protocol that did not include the use of sucrose, which is typically used as an  
119 osmoprotectant to prevent bacterial death during transformation (24, 25). We had observed  
120 very low rates of successful transformation during early trials with sucrose osmoprotection  
121 (data not shown), presumably due to sucrose-mediated toxicity.

122

123 We initially tried replacing sucrose with maltose, a structurally related disaccharide that we  
124 hoped would not be lethal to cells transformed with *sacB* plasmids. However, there was no  
125 significant increase in transformation efficiency with maltose osmoprotection (data not shown),  
126 which we attributed to *sacB* nonspecific reactivity with maltose, likely generating  
127 maltosylfructose (26, 27).

128

129 Our transformation efficiency returned to expected levels ( $10^{-4}$ - $10^{-5}$  per  $\mu\text{g}$  plasmid DNA for GBS  
130 strain CNCTC 10/84) with replacement of sucrose osmoprotectant with 25% (mass:mass)  
131 polyethylene-glycol (average MW 6000 daltons; PEG-6000), which we dissolved in rich

132 transformation media for competent cell outgrowth and in the wash solution in which we store  
133 and electroporate competent GBS.

134

135 GBS strain 10/84 transformed with pSacB23 or pMBsacB showed significant growth defects on  
136 solid media with supplemental 0.75 M sucrose (**Figure 3A**). We also tested the sensitivity of  
137 planktonic 10/84:pMBsacB to sucrose added to liquid media, and found significant growth  
138 impairment. Planktonic and solid media exposure could also be combined (**Figure 3B**). 10/84  
139 transformed with pHY304, by contrast, did not demonstrate significant sucrose sensitivity.

140

141 In order to directly visualize the phenotypic effect of sucrose exposure on GBS expressing SacB,  
142 we performed transmission electron microscopy on 10/84 transformed with pMBsacB or  
143 pHY304 and exposed to sucrose or control conditions. As shown in **Figure 4A-C**, sucrose  
144 exposure of 10/84 with pMBsacB resulted in abnormal cellular morphology, with apparent  
145 intracellular accumulation of inclusion bodies, eventually resulting in complete degradation of  
146 normal cellular architecture and eventual lysis. Apart from expected cell shrinkage from  
147 sucrose-mediated osmosis, GBS transformed with the control plasmid pHY304 showed normal  
148 architecture regardless of sucrose exposure (**Figures 4D-E**). SacB expression in the absence of  
149 sucrose had no apparent effect on morphology (**Figure 4F**).

150

151 *Sucrose counterselection improves the efficiency of allelic exchange mutagenesis*

152



153 To test whether sucrose counterselection could be used in GBS to produce allelic exchange  
154 mutants, we applied our system to deleting a gene that we and others had experience knocking  
155 out: the sortase gene *srtA* (28). This provided a benchmark against which efficiency of  
156 counterselection-assisted mutagenesis could be measured.

157

158 We used overlap extension PCR to generate a *srtA* mutagenesis cassette (*dSrtA*) in which  
159 approximately 800-bp homology arms flank an in-frame chloramphenicol acetyltransferase  
160 gene (*cat*), which confers chloramphenicol resistance, replacing the *srtA* coding sequence. This  
161 cassette was subcloned into pHY304 and pMBsacB, then used for transformation of 10/84 using  
162 PEG-6000 osmoprotection.

163

164 After transformation with either pHY304:*dSrtA* or pMBsacB:*dSrtA*, single-cross intermediate  
165 strains were produced by transitioning liquid cultures from 28 °C to 37 °C in the presence of  
166 erythromycin selection. Once chromosomal insertion was confirmed by PCR, the pHY304 and  
167 pMBsacB single-cross strains were serially passaged at 28 °C with no antibiotics or  
168 counterselection. At that point, each of the two cultures were used to seed two new cultures  
169 with chloramphenicol at 37 °C, one containing 0.75 M sucrose and the other a non-sucrose  
170 control.

171

172 Each of the four cultures (pHY304:*dSrtA* and pMBsacB:*dSrtA*, with and without sucrose) was  
173 passaged three times at 37 °C with chloramphenicol selection. Serial dilutions were then plated  
174 on chloramphenicol-containing solid media with or without erythromycin selection. While the

175 overall CFU concentration did not differ significantly between conditions—as indicated by equal  
176 growth on non-selective media—there was a dramatic difference between pMBsacB grown in  
177 the presence of sucrose and the other three outgrowth conditions. Exposure of the pMBsacB  
178 single-cross strain to sucrose eliminated virtually all erythromycin-resistant survival, suggesting  
179 successful counterselection (**Figure 5A-B**). PCR of the *cat* gene generated the expected 660-bp  
180 gel electrophoresis bands when genomic DNA from colonies that survived counterselection was  
181 used as template, but not wild type GBS DNA (**Figure 5C**). Sanger sequencing of DNA amplified  
182 using PCR primers that bind outside of the *dSrtA* homology arms confirmed that the *srtA* gene  
183 had been replaced by *cat*, as intended (**Figure 5D**). The pHY304 single-cross strain was not  
184 responsive to sucrose, and the pMBsacB erythromycin-resistant CFUs survived well in the  
185 absence of sucrose exposure.

186

187 *The pMBsacB mutagenesis system permits efficient generation of unmarked mutations in*  
188 *multiple GBS strains*

189

190 An effective counterselection system could facilitate generation of unmarked mutations,  
191 opening the possibility of performing sequential genome edits to produce complex mutants.

192

193 To explore whether pMBsacB could accelerate generation of unmarked mutations, we  
194 developed a mutagenesis cassette against the *cyE* gene, which encodes a key biosynthetic  
195 enzyme responsible for production of the GBS pigmented hemolytic toxin  $\beta$ -  
196 hemolysin/cytolysin (29-31). The mutagenesis cassette features a premature stop codon

197 surrounded by a set of silent mutation SNPs, establishing a unique barcode that would not  
198 likely arise through spontaneous mutation. The barcoded stop codon was flanked by 500-bp  
199 upstream and downstream homology arms (**Figure 6A**).

200

201 We cloned this cassette into pMBsacB, generating pMBsacB:*dCylE*, which was then transformed  
202 into two GBS strains, 10/84 and A909. After generation of the single-cross intermediate, which  
203 was non-hemolytic (data not shown), we used sucrose counterselection to isolate putative  
204 double-cross GBS, which could be either wild type—due to auto-excision of the plasmid at the  
205 same homology arm as crossed over during insertion—or a *cylE* knockout.

206

207 Counterselection against the single-cross strain again resulted in near-complete elimination of  
208 erythromycin resistant CFUs (**Figure 6B**).

209

210 When plated on solid media without antibiotic selection, the counterselection culture yielded  
211 an equal mix of pigmented and non-pigmented colonies, supporting the concept that the  
212 plasmid could auto-excise in one of two ways, only one of which would result in the non-  
213 pigmented phenotype expected of the knockout. If not exposed to sucrose, the single-cross  
214 intermediate retained erythromycin resistance and the colonies were uniformly nonpigmented,  
215 reflecting the fact that the population consisted almost entirely of unchanged, single-cross  
216 CFUs.

217

218 In the 10/84 experiment, we selected four non-pigmented colonies from the non-selective plate  
219 on which the sucrose-exposed culture had been grown. These were used for genomic DNA  
220 purification, followed by amplification of the *cyIE* coding sequence and Sanger sequencing. One  
221 of the four had the correct barcoded sequence, whereas the other three did not properly  
222 amplify during PCR, suggesting that the plasmid auto-excised in a manner that left a partial  
223 sequence deletion (**Figure 6C**).

224

225 In the case of A909, 20 out of 24 non-pigmented isolates properly amplified by PCR. We  
226 sequenced ten of these, nine of which had the expected barcoded premature stop codon  
227 (**Figure 6C**). Both 10/84 and A909 *cyIE* knockout strains generated using pMBsacB:*dCyIE* showed  
228 the anticipated non-pigmented, non-hemolytic phenotype (**Figure 6D**).

229

230 Unintended deletions during the final plasmid-excision is a phenomenon that we have  
231 subsequently observed in other mutagenesis experiments, suggesting that all mutants  
232 generated with pMBsacB must be confirmed by some combination of PCR and sequencing to  
233 ensure the desired genotype.

234

## 235 Discussion

236 Reliable methods for creating specific mutations are central to microbiological discovery.  
237 Existing methods for doing so in GBS have been limited in multiple respects. Without  
238 counterselection, the final screening step for plasmid auto-excision and curing is unreliable and  
239 inefficient, since it depends on random identification of a low-probability biological event.

240 Furthermore, most current methods rely on replacement of a coding sequence with an  
241 antibiotic resistance marker; this does not support rapid generation of small changes to the  
242 chromosome, such as individual SNPs. An earlier counterselection-based approach to GBS  
243 mutagenesis was limited by the fact that it required an already mutated background strain,  
244 which is not ideal for pathogenesis work (15). Together, these barriers make isolation of  
245 complex mutants with multiple, subtle chromosomal changes infeasible.

246

247 Our *sacB*-mediated counterselection system overcomes these limitations. The method is simple  
248 and does not require any additional equipment or experience beyond what is required for  
249 traditional approaches.

250

251 We validated our system by generating two knockouts: one (*srtA*) involved allelic exchange with  
252 a chloramphenicol resistance marker, while the other (*cyIE*) demonstrated the ability of our  
253 technique to produce small chromosomal changes at the single nucleotide level. In order to  
254 confirm that the system works in multiple GBS strains from different serotypes (which can show  
255 phenotypic variability under the same growth conditions), we generated the same *cyIE*  
256 mutation in A909 (serotype Ia) and 10/84 (serotype V). We noted that A909 grew less robustly  
257 on 0.75 M sucrose than 10/84; so for the A909 *cyIE* mutation, we used 0.5 M sucrose  
258 counterselection. When using this system in different strains, it is important to optimize the  
259 counterselection conditions prior to starting a new mutation.

260

261 As **Figure 5** shows, the *srtA* knockout can be generated at reasonable rates even without  
262 counterselection. There was considerable variability from one experimental replicate to the  
263 next, but the mean recovery rate of knockouts in the sucrose-negative conditions was 29-57%,  
264 regardless of whether the mutagenesis plasmid was pHY304 or pMBsacB. In contrast, the mean  
265 recovery rate in the pMBsacB sucrose-positive condition was 99%, with low variability.

266

267 In the case of low-fitness mutations, however, rates of recovery without counterselection can  
268 be much lower (32). The last step in the mutagenesis workflow—auto-excision and curing of the  
269 plasmid—essentially establishes a competition assay between the single-cross strain and the  
270 intended mutant (12). If the mutant has a survival defect, the odds of randomly selecting a  
271 mutant colony from among the single-cross population is very low. By shrinking the single-cross  
272 background, the pMBsacB counterselection system increases the odds of isolating the desired  
273 mutant. Particularly when the goal is mutation of high-fitness genes, we have found that it is  
274 important to confirm sucrose sensitivity of the transformant and single-cross intermediate,  
275 since spontaneous mutations in the *sacB* gene could lead to escape of unmodified high-fitness  
276 genes once sucrose counterselection is applied.

277

278 In the case of unmarked mutations, where no new antibiotic resistance is introduced into the  
279 chromosome, the bacterial population after counterselection is expected to be a mixture of the  
280 desired mutant and wild type bacteria that reverted following plasmid auto-excision. This  
281 occurred in our *cyIE* knockout experiment, where roughly equal fractions of the post-

282 counterselection population showed knockout and wild type  $\beta$ -hemolysin/cytolysin  
283 pigmentation phenotypes.  
284  
285 This means that for mutations that do not cause an easily assayable phenotype (such as  
286 pigment expression), sequence-based confirmation will be necessary. There are several  
287 possible ways to perform this confirmation. Here, we used PCR followed by Sanger sequencing,  
288 but probe- or qPCR-based SNP assays are alternative strategies. Confirmation by some means is  
289 important, given that plasmid auto-excision can leave unintended deletions, as was the case in  
290 several colonies in our *cyIE* experiment.

291  
292 In summary, we have presented a new, straightforward counterselection-based approach to  
293 generating flexible mutations in GBS. Our future plans for this work involve modifications to  
294 coding and non-coding sequences, including promoter alterations, addition of fluorescent and  
295 affinity tags to natively expressed genes, and generation of multiple knockout strains.

296

## 297 Methods

298

### 299 *Bacterial strains and growth conditions*

300

301 GBS strains CNCTC 10/84 (serotype V, sequence type 26) and A909 (serotype Ia, sequence type  
302 7) and *B. subtilis* strain 168 were maintained as frozen glycerol stocks and were grown on  
303 tryptic soy (TS; Fisher Scientific product number DF0370-17-3) agar plates or stationary in TS

304 broth at 37 °C or 28 °C. Chemically competent *Escherichia coli* DH5 $\alpha$  were purchased from New  
305 England Biolabs (product number C2987H) and were stored and transformed according to  
306 manufacturer instructions. *E. coli* growth was at 37 °C unless transformed with a temperature-  
307 sensitive plasmid, in which case the growth temperature was 28 °C. Antibiotic concentrations  
308 were as follows: erythromycin 5  $\mu$ g/mL (GBS) or 300  $\mu$ g/mL (*E. coli*), chloramphenicol 1  $\mu$ g/mL  
309 (GBS) or 10  $\mu$ g/mL (*E. coli*). 0.5 M and 0.75 M sucrose-containing broth and solid media were  
310 prepared by diluting a filter-sterilized 2 M sucrose stock solution in appropriate media and  
311 adding any necessary antibiotics to the final mixture.

#### 312 *Cloning technique*

313

314 All shuttle vectors and derivatives used in this study were initially cloned into *E. coli* DH5 $\alpha$ , from  
315 which plasmid DNA for downstream applications was purified using the Qiagen QIAprep  
316 Miniprep kit (product number 27104) according to manufacturer instructions.

317

#### 318 *Isolation of genomic DNA*

319

320 Genomic DNA from GBS and *B. subtilis* was isolated using the Applied Biosystems MagMAX  
321 CORE kit (product number A32700) with a KingFisher magnetic bead processing system  
322 according to manufacturer instructions, with the following minor modifications. Overnight  
323 liquid culture volumes were 1-10 mL. After pelleting by centrifugation at 3200 x g, the bacteria  
324 were lysed in a solution containing 100  $\mu$ L manufacturer-supplied proteinase K and PK buffer,  
325 50  $\mu$ L lysozyme (100 mg/mL in water), and 5  $\mu$ L mutanolysin (10 kU in 2 mL 0.1 M potassium



326 phosphate buffer pH 6.2). Lysis was performed at 37 °C for 30 minutes, then 55 °C for 30  
327 minutes, followed by a 2-minute centrifugation at 3200 x g. The rest of the extraction followed  
328 manufacturer instructions, using the MagMAX CORE Flex KingFisher protocol file.

329

### 330 *Construction of pSacB23 and pMBSacB*

331

332 The *sacB* coding sequence was amplified from *B. subtilis* 168 genomic DNA using primers  
333 *sacB\_pORI23\_F* and *sacB\_pORI23\_R*, which contain Gibson assembly overhang sequences  
334 compatible with pORI23 digested with *BamHI*. Successful clones were identified by Sanger  
335 sequencing (data not shown), after which the p23 promoter-*sacB* cassette was amplified with  
336 *p23sacB\_cassette\_F* and *p23sacB\_cassette\_R* and subcloned into pHY304 digested with *Avall*  
337 (see **Figure 1**). Outgrowth of the pMBSacB cloning reaction was performed at 28 °C and  
338 successful clones were identified with Sanger sequencing (data not shown).

339

### 340 *Transformation of GBS with pSacB23 and pMBSacB*

341

342 Electrocompetent GBS suitable for transformation with *sacB*-containing plasmids were  
343 prepared following methods outlined by Holo and Nes (25) and Framson et al. (24) modified to  
344 prevent toxicity from sucrose osmoprotectant.

345

346 Single 10/84 or A909 colonies from TS agar plates were used to seed 5 mL M17 (BD Difco  
347 218561) + 0.5% glucose liquid cultures, which were grown at 37 °C to stationary phase. 500 µL

348 from these cultures were then used to seed filter sterilized 50 mL M17 + 0.5% glucose, 2.5%  
349 (A909) or 0.6% (10/84) glycine, and 25% (mass:mass) PEG-6000.

350

351 Following overnight growth at 37 °C, this culture was diluted in pre-warmed 130 mL of the  
352 same media and allowed to grow for 1 hr. The entire volume was pelleted at 3200 x g, then  
353 washed twice in ice cold 25% PEG-6000 + 10% glycerol. Following these washes, the samples  
354 were resuspended in 1 mL of wash solution and either used immediately for transformation or  
355 stored in aliquots at -80 °C.

356

357 Electroporation and transformation of competent GBS was performed as described by Holo and  
358 Nes (25), except that sucrose in the outgrowth media was replaced with 25% PEG-6000, and—  
359 in the case of pMBsacB—outgrowth was performed at 28 °C instead of 37 °C.

360

361 *Sucrose killing assays*

362

363 Wild type GBS or transformants were grown overnight in appropriate antibiotic selection  
364 without supplemental sucrose. For killing assays on agar plates, overnight cultures were serially  
365 diluted and plated directly on TS agar with appropriate antibiotic selection, with or without  
366 supplemental sucrose. CFU quantification was performed after 1-2 days of growth. For killing  
367 assays during planktonic growth, the overnight cultures were diluted 1:50 in broth without  
368 sucrose, grown to log phase, then exposed to sucrose supplementation (or control outgrowth

369 with only sterile water added to the broth) for two hours, at which time the cultures were  
370 diluted and plated on appropriate solid media for CFU quantification after 1-2 days of growth.

371

### 372 *Transmission electron microscopy*

373

374 10/84 transformed with pMBsacB or pHY304 was grown to mid-log phase in selective broth.

375 That culture was used to seed a new culture with or without supplemental sucrose. After

376 outgrowth to early-mid log phase, the bacteria were fixed with 2.5% glutaraldehyde and 2%

377 paraformaldehyde and washed with cacodylate buffer (50 mM, pH 7.2), then post fixed with 2%

378 osmium tetroxide. Bacteria were embedded in 2% agar, then cut and stained in the dark with

379 0.5% (w/v) uranyl acetate. Samples were dehydrated with alcohol, transferred to propylene

380 oxide/Epon mixtures and finally embedded in EMbed 812 (Electron Microscopy Sciences,

381 Hatfield, PA). Thin sections were cut, adsorbed on electron microscope grids, and stained with

382 uranyl acetate and lead citrate. Stained grids were then imaged in a Philips CM12 electron

383 microscope (FEI; Eindhoven, The Netherlands) and photographed with a Gatan (4kx2.7k) digital

384 camera (Gatan Inc., Pleasanton, CA).

385

### 386 *Construction of pMBsacB:dSrtA and pMBsacB:dCylE*

387

388 The *dSrtA* mutagenesis cassette consisted of the *cat* gene with 822-bp upstream and 795-bp

389 downstream homology arms that matched the 10/84 chromosomal regions flanking the *srtA*

390 gene. The three fragments were amplified from template DNA (10/84 genomic DNA or pDC123,

391 a shuttle vector containing *cat*). The primers used to generate the upstream, coding, and  
392 downstream cassette regions of the mutagenesis cassette were dSrtA\_US\_F/R, *cat*\_F/R, and  
393 dSrtA\_DS\_F/R, respectively.

394

395 Next, overlap extension PCR was used to join the three regions (28). The upstream homology  
396 arm was first joined to *cat*, after which the downstream homology arm was attached. The two-  
397 fragment intermediate and the final cassette were gel extracted and used for TOPO cloning into  
398 pCR2.1-TOPO, followed by Sanger sequence confirmation (data not shown). After successful  
399 construction, the complete cassette was digested out of pCR2.1-TOPO with *NotI* and *KpnI*, then  
400 ligated with T4 ligase overnight at 16 °C into pHY304 double-digested with the same restriction  
401 enzymes. For insertion of the *dSrtA* cassette into pMBsacB, the construct was amplified out of  
402 pHY304:*dSrtA* using primers dSrtA\_GA\_F and dSrtA\_GA\_R, then cloned into pMBsacB at the  
403 *NotI* and *XhoI* sites using Gibson assembly.

404

405 The 1500-bp *dCylE* cassette was amplified out of GBS strain AR1598, a derivative of 10/84 in  
406 which the *cylE* gene has a barcoded premature stop codon (**Figure 6B**), using primers  
407 dCylE\_GA\_F and dCylE\_GA\_R. This amplicon was similarly cloned into the *NotI* and *XhoI* sites of  
408 pMBsacB using Gibson assembly.

409

410 *Allelic exchange using sucrose counterselection against pMBsacB*

411

412 After transformation of GBS, using the method described above, with pMBsacB (or pHY304  
413 control) bearing a mutagenesis cassette (*dSrtA* or *dCylE*), successful transformants were grown  
414 in TS broth with appropriate antibiotic selection (erythromycin with or without  
415 chloramphenicol) at 28 °C. Sucrose sensitivity of the transformants was confirmed by plating  
416 serial dilutions on TS agar with 0.5 M (for A909) or 0.75 M (for 10/84) sucrose and appropriate  
417 antibiotic selection at 28 °C.

418

419 To generate single-cross intermediates, transformants were serially passaged three times at 28  
420 °C with erythromycin selection. The third passage was then used to seed another culture at 37  
421 °C with erythromycin selection, which was grown overnight. Serial dilutions of the final culture  
422 were plated on TS agar with erythromycin at 37 °C. Individual colonies were grown and tested  
423 for sucrose sensitivity. Genomic DNA was also extracted and tested by PCR for proper vector  
424 insertion using either *cylE\_farout\_F* or *srtA\_farout\_F*, which match chromosomal sites outside  
425 of the homology arms, and *pMBsacB\_MCS\_F*, which binds pMBsacB and pHY304 upstream of  
426 the cloning sites used in this study (data not shown).

427

428 Single-cross intermediate strains with the correct sucrose sensitivity phenotype and PCR-  
429 confirmed genotype were then grown in TS broth without antibiotics at 28 °C and passaged  
430 three times in order to enrich for spontaneous double-cross events. To counterselect against  
431 pMBsacB, the third passage was used to seed TS broth with sucrose at 37 °C. In *srtA* knockout  
432 experiments, chloramphenicol was added to the sucrose-containing broth. The sucrose culture  
433 was passaged three times at 37 °C, and then serial dilutions were plated on TS agar with or

434 without chloramphenicol. Simultaneous plating on erythromycin-containing TS agar (with or  
435 without chloramphenicol) was used to quantify the effectiveness of counterselection against  
436 pMBSacB.  
437  
438 Knockout candidates from the non-erythromycin plate were confirmed to be erythromycin  
439 sensitive by patching to a new plate. Genomic DNA extraction followed by PCR and Sanger  
440 sequencing confirmed plasmid excision and the correct knockout DNA sequence. For the *srtA*  
441 knockout, the region was amplified using primers *srtA\_farout\_F/R* and these amplicons were  
442 sequenced using *srtA\_farout\_F* and *cat\_F* primers. For the *cyIE* knockout, the region was  
443 amplified using *cyIE\_farout\_F/R* and the barcoded mutation was confirmed by sequencing with  
444 the *dCylE\_conf\_F* primer.  
445  
446 pHY304 knockout controls were subjected to the same steps, including sucrose exposure,  
447 unless otherwise noted. Non-sucrose exposure control conditions were identical except that  
448 the three final passages of the single-cross strain at 37 °C were performed in the absence of  
449 sucrose.

450

#### 451 Acknowledgements

452

453 We thank NYU Langone Health DART Microscopy Laboratory for the consultation and assistance  
454 with transmission electron microscopy work.

455

456 Funding

457

458 This work was supported by NIH/NIAID K08AI132555 to TAH and R56 AI136499 to AJR.

459

460 Conflicts of interest

461

462 AJR has served as a consultant to Pfizer. The other authors have no financial or other conflicts

463 of interest to disclose.

464

465

466 References

467

- 468 1. **Baker CJ.** 2013. The spectrum of perinatal group B streptococcal disease. *Vaccine* **31**  
469 **Suppl 4**:D3–6.
- 470 2. **Stoll BJ, Hansen NI, Sánchez PJ, Faix RG, Poindexter BB, Van Meurs KP, Bizzarro MJ,**  
471 **Goldberg RN, Frantz ID, Hale EC, Shankaran S, Kennedy K, Carlo WA, Watterberg KL,**  
472 **Bell EF, Walsh MC, Schibler K, Laptook AR, Shane AL, Schrag SJ, Das A, Higgins RD,**  
473 **Eunice Kennedy Shriver National Institute of Child Health and Human Development**  
474 **Neonatal Research Network.** 2011. Early onset neonatal sepsis: the burden of group B  
475 Streptococcal and E. coli disease continues. *Pediatrics* **127**:817–826.
- 476 3. **Schrag SJ, Farley MM, Petit S, Reingold A, Weston EJ, Pondo T, Hudson Jain J, Lynfield R.**  
477 2016. Epidemiology of Invasive Early-Onset Neonatal Sepsis, 2005 to 2014. *Pediatrics*  
478 **138**:e20162013–e20162013.
- 479 4. **Muñoz P, Llancaqueo A, Rodríguez-Créixems M, Peláez T, Martin L, Bouza E.** 1997.  
480 Group B streptococcus bacteremia in nonpregnant adults. *Arch Intern Med* **157**:213–216.
- 481 5. **Reingold A, Watt JP.** 2015. Group B streptococcus infections of soft tissue and bone in  
482 California adults, 1995–2012. *Epidemiol Infect* **143**:3343–3350.
- 483 6. **Kayansamruaj P, Pirarat N, Hirono I, Rodkhum C.** 2014. Increasing of temperature  
484 induces pathogenicity of *Streptococcus agalactiae* and the up-regulation of inflammatory



- 485 related genes in infected Nile tilapia (*Oreochromis niloticus*). *Vet Microbiol* **172**:265–271.
- 486 7. **Botelho ACN, Ferreira AFM, Fracalanza SEL, Teixeira LM, Pinto TCA.** 2018. A  
487 Perspective on the Potential Zoonotic Role of *Streptococcus agalactiae*: Searching for a  
488 Missing Link in Alternative Transmission Routes. *Front Microbiol* **9**:608.
- 489 8. **Kalimuddin S, Chen SL, Lim CTK, Koh TH, Tan TY, Kam M, Wong CW, Mehershahi KS,**  
490 **Chau ML, Ng LC, Tang WY, Badaruddin H, Teo J, Apisarnthanarak A, Suwantararat N, Ip M,**  
491 **Holden MTG, Hsu LY, Barkham T, Singapore Group B Streptococcus Consortium.** 2017.  
492 2015 Epidemic of Severe *Streptococcus agalactiae* Sequence Type 283 Infections in  
493 Singapore Associated With the Consumption of Raw Freshwater Fish: A Detailed Analysis  
494 of Clinical, Epidemiological, and Bacterial Sequencing Data. *Clin Infect Dis* **64**:S145–S152.
- 495 9. **Tan S, Lin Y, Foo K, Koh HF, Tow C, Zhang Y, Ang LW, Cui L, Badaruddin H, Ooi PL, Lin**  
496 **RTP, Cutter J.** 2016. Group B *Streptococcus* Serotype III Sequence Type 283 Bacteremia  
497 Associated with Consumption of Raw Fish, Singapore. *Emerging Infect Dis* **22**:1970–1973.
- 498 10. **Håvarstein LS, Hakenbeck R, Gaustad P.** 1997. Natural competence in the genus  
499 *Streptococcus*: evidence that streptococci can change phenotype by interspecies  
500 recombinational exchanges. *J Bacteriol* **179**:6589–6594.
- 501 11. **Brochet M, Rusniok C, Couve E, Dramsi S, Poyart C, Trieu-Cuot P, Kunst F, Glaser P.**  
502 2008. Shaping a bacterial genome by large chromosomal replacements, the evolutionary  
503 history of *Streptococcus agalactiae*. *Proc Natl Acad Sci USA* **105**:15961–15966.
- 504 12. **Yim HH, Rubens CE.** 1998. Site-specific homologous recombination mutagenesis in group

- 505 B streptococci. *Methods in Cell Science* **20**:13–20.
- 506 13. **Sheen TR, Jimenez A, Wang N-Y, Banerjee A, van Sorge NM, Doran KS.** 2011. Serine-rich  
507 repeat proteins and pili promote *Streptococcus agalactiae* colonization of the vaginal  
508 tract. *Journal of Bacteriology* **193**:6834–6842.
- 509 14. **Quach D, van Sorge NM, Kristian SA, Bryan JD, Shelver DW, Doran KS.** 2009. The CiaR  
510 response regulator in group B *Streptococcus* promotes intracellular survival and  
511 resistance to innate immune defenses. *Journal of Bacteriology* **191**:2023–2032.
- 512 15. **Tamura GS, Bratt DS, Yim HH, Nittayajarn A.** 2005. Use of glnQ as a counterselectable  
513 marker for creation of allelic exchange mutations in group B streptococci. *Appl Environ*  
514 *Microbiol* **71**:587–590.
- 515 16. **Meng G, Fütterer K.** 2003. Structural framework of fructosyl transfer in *Bacillus subtilis*  
516 levansucrase. *Nat Struct Biol* **10**:935–941.
- 517 17. **Marvasi M, Visscher PT, Casillas Martinez L.** 2010. Exopolymeric substances (EPS) from  
518 *Bacillus subtilis*: polymers and genes encoding their synthesis. *FEMS Microbiol Lett*  
519 **313**:1–9.
- 520 18. **Porras-Domínguez JR, Ávila-Fernández Á, Miranda-Molina A, Rodríguez-Alegria ME,**  
521 **Munguia AL.** 2015. *Bacillus subtilis* 168 levansucrase (SacB) activity affects average levan  
522 molecular weight. *Carbohydr Polym* **132**:338–344.
- 523 19. **Ortiz-Soto ME, Rudiño-Piñera E, Rodríguez-Alegria ME, Munguia AL.** 2009. Evaluation of

- 524 cross-linked aggregates from purified *Bacillus subtilis* levansucrase mutants for  
525 transfructosylation reactions. *BMC Biotechnol* **9**:68.
- 526 20. **Abdel-Fattah AF, Mahmoud DAR, Esawy MAT.** 2005. Production of levansucrase from  
527 *Bacillus subtilis* NRC 33a and enzymic synthesis of levan and Fructo-Oligosaccharides.  
528 *Curr Microbiol* **51**:402–407.
- 529 21. **Ortiz-Soto ME, Rivera M, Rudiño-Piñera E, Olvera C, López-Munguía A.** 2008. Selected  
530 mutations in *Bacillus subtilis* levansucrase semi-conserved regions affecting its  
531 biochemical properties. *Protein Eng Des Sel* **21**:589–595.
- 532 22. **Marx CJ.** 2008. Development of a broad-host-range *sacB*-based vector for unmarked  
533 allelic exchange. *BMC Res Notes* **1**:1.
- 534 23. **Li Y, Thompson CM, Lipsitch M.** 2014. A modified Janus cassette (Sweet Janus) to  
535 improve allelic replacement efficiency by high-stringency negative selection in  
536 *Streptococcus pneumoniae*. *PLoS ONE* **9**:e100510.
- 537 24. **Framson PE, Nittayajarn A, Merry J, Youngman P, Rubens CE.** 1997. New genetic  
538 techniques for group B streptococci: high-efficiency transformation, maintenance of  
539 temperature-sensitive pWV01 plasmids, and mutagenesis with Tn917. *Appl Environ*  
540 *Microbiol* **63**:3539–3547.
- 541 25. **Holo H, Nes IF.** 1989. High-Frequency Transformation, by Electroporation, of  
542 *Lactococcus-Lactis* Subsp *Cremoris* Grown with Glycine in Osmotically Stabilized Media.  
543 *Appl Environ Microbiol* **55**:3119–3123.

- 544 26. **Canedo M, Jimenez-Estrada M, Cassani J, López-munguía A.** 1999. Production of  
545 Maltosylfructose (Erlöse) with Levansucrase from *Bacillus Subtilis*. *Biocatalysis and*  
546 *Biotransformation* **16**:475–485.
- 547 27. **Seibel J, Moraru R, Götze S, Buchholz K, Na’amnieh S, Pawlowski A, Hecht H-J.** 2006.  
548 Synthesis of sucrose analogues and the mechanism of action of *Bacillus subtilis*  
549 fructosyltransferase (levansucrase). *Carbohydr Res* **341**:2335–2349.
- 550 28. **Lalioui L, Pellegrini E, Dramsi S, Baptista M, Bourgeois N, Doucet-Populaire F, Rusniok C,**  
551 **Zouine M, Glaser P, Kunst F, Poyart C, Trieu-Cuot P.** 2005. The SrtA Sortase of  
552 *Streptococcus agalactiae* is required for cell wall anchoring of proteins containing the  
553 LPXTG motif, for adhesion to epithelial cells, and for colonization of the mouse intestine.  
554 *Infection and Immunity* **73**:3342–3350.
- 555 29. **Whidbey C, Harrell MI, Burnside K, Ngo L, Becraft AK, Iyer LM, Aravind L, Hitti J,**  
556 **Waldorf KMA, Rajagopal L.** 2013. A hemolytic pigment of Group B *Streptococcus* allows  
557 bacterial penetration of human placenta. *J Exp Med* **210**:1265–1281.
- 558 30. **Rosa-Fraile M, Dramsi S, Spellerberg B.** 2014. Group B streptococcal haemolysin and  
559 pigment, a tale of twins. *FEMS Microbiol Rev* **38**:932–946.
- 560 31. **Randis TM, Gelber SE, Hooven TA, Abellar RG, Akabas LH, Lewis EL, Walker LB, Byland**  
561 **LM, Nizet V, Ratner AJ.** 2014. Group B *Streptococcus*  $\beta$ -hemolysin/cytolysin breaches  
562 maternal-fetal barriers to cause preterm birth and intrauterine fetal demise in vivo. *J*  
563 *Infect Dis* **210**:265–273.

- 564 32. **Link AJ, Jeong KJ, Georgiou G.** 2007. Beyond toothpicks: new methods for isolating  
565 mutant bacteria. *Nat Rev Micro* **5**:680–688.
- 566 33. **Zeigler DR, Prágai Z, Rodriguez S, Chevreux B, Muffler A, Albert T, Bai R, Wyss M,**  
567 **Perkins JB.** 2008. The origins of 168, W23, and other *Bacillus subtilis* legacy strains.  
568 *Journal of Bacteriology* **190**:6983–6995.
- 569 34. **Hooven TA, Randis TM, Daugherty SC, Narechania A, Planet PJ, Tettelin H, Ratner AJ.**  
570 2014. Complete Genome Sequence of *Streptococcus agalactiae* CNCTC 10/84, a  
571 Hypervirulent Sequence Type 26 Strain. *Genome Announcements* **2**:e01338–14–e01338–  
572 14.
- 573 35. **Chaffin DO, Rubens CE.** 1998. Blue/white screening of recombinant plasmids in Gram-  
574 positive bacteria by interruption of alkaline phosphatase gene (*phoZ*) expression. *Gene*  
575 **219**:91–99.
- 576 36. **Que YA, Haefliger JA, Francioli P, Moreillon P.** 2000. Expression of *Staphylococcus*  
577 *aureus* clumping factor A in *Lactococcus lactis* subsp *cremoris* using a new shuttle vector.  
578 *Infection and Immunity* **68**:3516–3522.
- 579

**Table 1: Strains, plasmids, and primers used in this study**

| <b>Strains</b>              |                                                                                                                                                                                         |                                                                                                                                                                  |
|-----------------------------|-----------------------------------------------------------------------------------------------------------------------------------------------------------------------------------------|------------------------------------------------------------------------------------------------------------------------------------------------------------------|
| Strain                      | Description                                                                                                                                                                             | Reference                                                                                                                                                        |
| <i>E. coli</i> DH5 $\alpha$ | Chemically competent cloning strain                                                                                                                                                     | New England Biolabs item # C2987H                                                                                                                                |
| <i>B. subtilis</i> 168      | Legacy strain derived from <i>B. subtilis</i> Marburg                                                                                                                                   | (33)                                                                                                                                                             |
| GBS CNCTC 10/84             | Serotype V, sequence type 26                                                                                                                                                            | (34)                                                                                                                                                             |
| GBS A909                    | Serotype Ia, sequence type 7                                                                                                                                                            |                                                                                                                                                                  |
| GBS AR1598                  | Serotype V, sequence type 26 10/84 mutant with barcoded premature stop codon in <i>cylE</i> gene                                                                                        | This study                                                                                                                                                       |
| <b>Plasmids</b>             |                                                                                                                                                                                         |                                                                                                                                                                  |
| Name                        | Description                                                                                                                                                                             | Reference                                                                                                                                                        |
| pDC123                      | Shuttle vector with the chloramphenicol acetyltransferase gene used as PCR template                                                                                                     | (35)                                                                                                                                                             |
| pHY304                      | Broad host range, temperature sensitive mutagenesis plasmid; pWV01 derivative; erythromycin-resistant                                                                                   | (12)                                                                                                                                                             |
| pMBsacB                     | pHY304 with p23- <i>sacB</i> cassette cloned into <i>Avall</i> site, for sucrose-counterselectable GBS mutagenesis                                                                      | This study                                                                                                                                                       |
| pOri23                      | Shuttle vector with <i>oriColE1</i> and <i>Lactococcus</i> -derived Gram-positive origin of replication; erythromycin-resistant; p23 promoter adjacent to <i>BamHI</i> restriction site | (36)                                                                                                                                                             |
| pSacB23                     | pORI23 with <i>sacB</i> cloned into <i>BamHI</i> site for expression off p23 promoter                                                                                                   | This study                                                                                                                                                       |
| <b>Primers</b>              |                                                                                                                                                                                         |                                                                                                                                                                  |
| Name                        | Sequence (5' to 3')                                                                                                                                                                     | Description                                                                                                                                                      |
| cat_F                       | ATGGAGAAAAAATCACTGGATATACCACC                                                                                                                                                           | Amplifies <i>cat</i> gene for allelic exchange knockout screening and for overlap extension PCR to make <i>dSrtA</i> mutagenesis cassette (from pDC123 template) |
| cat_R                       | CCCGCCCTGCCACTCATCGC                                                                                                                                                                    |                                                                                                                                                                  |
| cylE_farout_F               | TACACGCGAGATCGGTTAGC                                                                                                                                                                    | Binds GBS chromosome outside of the <i>dCylE</i> mutagenesis cassette region, for confirming single- and double-crossover events at the <i>cylE</i> locus        |
| cylE_farout_R               | CTGGTGTTCTGAAGCGAGT                                                                                                                                                                     |                                                                                                                                                                  |
| dCylE_GA_F                  | ATTGGGTACCGGGCCCCCCAGATGCTATA AAAGCAGC                                                                                                                                                  | Amplifies <i>dCylE</i> mutagenesis cassette (from AR1598 template) for Gibson assembly into pMBsacB <i>NotI/XhoI</i> digest                                      |
| dCylE_GA_R                  | TGGAGCTCCACCGCGGTGGCCCTGTTTACTT GTTCCGATAAAAAG                                                                                                                                          |                                                                                                                                                                  |
| dCylE_Conf_F                | CCAACGAAGCCACTGTCTCT                                                                                                                                                                    | Sequencing primer to confirm barcoded stop codon in the <i>cylE</i> gene                                                                                         |

|                    |                                                                 |                                                                                                                                                           |
|--------------------|-----------------------------------------------------------------|-----------------------------------------------------------------------------------------------------------------------------------------------------------|
| dSrtA_DS_F         | GCGATGAGTGGCAGGGCGGGGCGTAAAAGG<br>TAGTTAGAATTATGAAATTAAGGCTGTTC | Amplifies downstream homology arm for <i>dSrtA</i> mutagenesis cassette; overlap extension PCR compatible                                                 |
| dSrtA_DS_R         | GCGCGCGCCTCGAGGCGTTTTAACTTTCGTGT<br>CTCTAGATTCATCATAATTCAGAAGT  |                                                                                                                                                           |
| dSrtA_GA_F         | GCTTCCAAGGAGCTAAAGAGGAATTCGAAAA GCCCTGAC                        | Amplifies <i>dSrtA</i> mutagenesis cassette for Gibson assembly into pMBsacB <i>NotI/XhoI</i> digest                                                      |
| dSrtA_GA_R         | ATTCACTACTTTTAGTTAAGTTATTTGTAA<br>CTGTTAATTGTCC                 |                                                                                                                                                           |
| dSrtA_US_F         | GCGCGCGCGATCCAATTTAGGGCGTGTGT<br>ATCGTTTAAAAGCATAT              | Amplifies upstream homology arm for <i>dSrtA</i> mutagenesis cassette; overlap extension PCR compatible                                                   |
| dSrtA_US_R         | GGTGGTATATCCAGTGATTTTTTCTCCATGA<br>AACCATGTGATTTTTTTTATT        |                                                                                                                                                           |
| p23sacB_cassette_F | GCTTCCAAGGAGCTAAAGAGGTCCTTAACT<br>AAAAGTAGTGAATTTTTGATTTTTG     | Amplifies p23 promoter- <i>sacB</i> gene from pSacB23 for Gibson assembly into pHY304 <i>AvaII</i> digest                                                 |
| p23sacB_cassette_R | AAATTCCCCGTAGGCGCTAGGCATGCGTTA<br>TTTGTTAACTGTTAATTGTCC         |                                                                                                                                                           |
| pMBsacB_MCS_F      | CAATACGCAAACCGCCTCTC                                            | Binds pMBsacB, for use with “farout” primers for confirmation of single-cross insertion                                                                   |
| sacB_pORI23_F      | TATGAATGACAATGATGTTGATGAACATC AAAAAGTTTGC                       | Amplifies <i>sacB</i> from <i>B. subtilis</i> 168 for Gibson assembly into pORI23 <i>BamHI</i> digest                                                     |
| sacB_pORI23_R      | AGCTTGCTGCAGGTCGACGTTATTTGTTA<br>ACTGTTAATTGTCC                 |                                                                                                                                                           |
| srtA_farout_F      | AGAGCACAAAAACGTGGAGG                                            | Binds GBS chromosome outside of the <i>dSrtA</i> mutagenesis cassette region, for confirming single- and double-crossover events at the <i>srtA</i> locus |
| srtA_farout_R      | ACTGCTAAGGTATCGTTAGACCC                                         |                                                                                                                                                           |

## Figure Captions

**Figure 1. Schematic of pMBsacB-mediated GBS mutagenesis:** Following insertion of a mutagenesis cassette into pMBsacB and transformation of GBS at 28 °C (1), the transformed strain is used to seed a 37 °C culture, selecting for single-crossover events at one of the homology arms (2). After removal of antibiotic selection and growth at 28 °C to promote a second crossover event and plasmid expulsion (3), sucrose is added as counterselection to isolate the desired allelic exchange clones (4). In the absence of sucrose counterselection, step 4 resembles traditional mutagenesis techniques (red box), in which identification of the allelic exchange depends on chance discovery of a clone with spontaneous loss of plasmid-based antibiotic resistance.

**Figure 2. Development of pMBsacB:** The *sacB* coding sequence was amplified from *B. subtilis* 168 and inserted at the *Bam*HI site in pORI23, placing the gene adjacent to the p23 promoter in pSacB23 (1). The promoter-gene cassette was then amplified from pSacB23 (2) and cloned into the *Av*all site of the broad host range, temperature-sensitive plasmid pHY304 (3), generating pMBsacB.

**Figure 3. *sacB* confers lethal sucrose sensitivity in GBS:** Stationary phase WT GBS 10/84 or 10/84 transformed with plasmids used in this study was serially 10-fold diluted and plated on TS agar plates with appropriate antibiotic selection with or without supplemental 0.75 M sucrose (A). The first dilution shown is 10<sup>-1</sup>. pMBsacB-based sucrose sensitivity functions in



liquid culture and on solid media, whereas pHY304 does not affect GBS survival in sucrose in either growth condition (B; \*\*\*  $p < 0.0001$ , ANOVA).

**Figure 4. Transmission electron microscopy reveals that SacB expression under sucrose counterselection results in destructive intracellular inclusions:** Early-log phase GBS strain 10/84 transformed with pMBsacB and exposed to 0.75 M sucrose for 3 hours shows intracellular inclusion bodies that lead to degraded architecture and eventual lysis (A-C). GBS transformed with the control plasmid pHY304 shows normal architecture under baseline growth conditions (D) and only expected osmotic effects when grown with supplemental sucrose (E). SacB expression in the absence of sucrose counterselection has no apparent effect on GBS morphology (F).

**Figure 5. Allelic exchange mutagenesis of the *srtA* gene is made more efficient by using pMBsacB:** Sucrose exposure of single-cross pMBsacB:*dsrtA* knockout intermediates results in selection against erythromycin-resistant clones, which is not seen with the pHY304:*dsrtA* single-cross strain (A). Recovery of phenotypically correct knockout clones is significantly more efficient using pMBsacB than when mutagenesis is performed with pHY304 (B; \*  $p < 0.05$ , T test). PCR of *cat* results in successful amplification of genomic DNA from 11 knockout (KO) candidates, but not from wild type (WT) or template-negative (Neg) controls (C). Sanger sequences of the *srtA* region amplified using primers outside of the mutagenesis cassette were combined to generate a consensus sequence, which was aligned to the expected knockout template. Erm=erythromycin, Cm=chloramphenicol, suc=sucrose.

**Figure 6. pMBSacB permits efficient generation of unmarked mutations in the *cyIE* gene:** After generation of a *cyIE* mutagenesis cassette bearing a premature stop codon barcoded by additional silent SNPs, the cassette was cloned into pMBSacB and used to knockout  $\beta$ -hemolysin/cytolysin expression in GBS 10/84 and A909 (A). Sucrose counterselection resulted in near-complete elimination of erythromycin-resistant CFUs (B). Clones that survived counterselection were screened for the barcoded mutation by performing PCR with *cyIE\_farout\_F/R* primers and Sanger sequencing of the amplified genomic region of interest with *dCylE\_Conf\_F* (C). Representative traces are shown for the bands marked by asterisks. The recovered knockout strains had the expected non-hemolytic phenotype when plated on 5% sheep's blood agar (D). Erm=erythromycin.

Figure 1

1. Transform pMBSacB:mutagenesis construct at 28°C (+Erm)    2. Select for single-cross insertions at 37°C (+Erm)

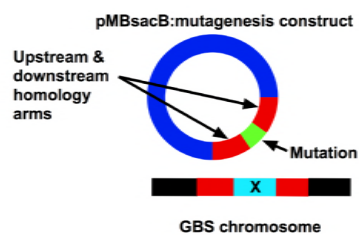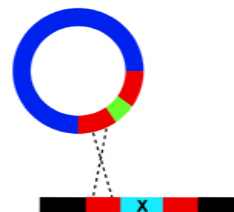

3. Passage at 28°C (no selection)

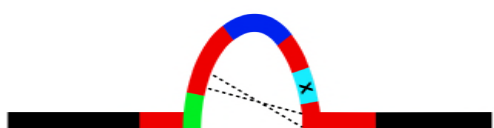

4. Plate double-cross mutants at 37°C (+/- antibiotics)

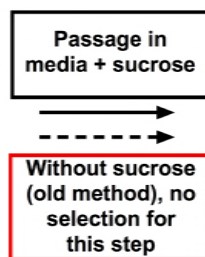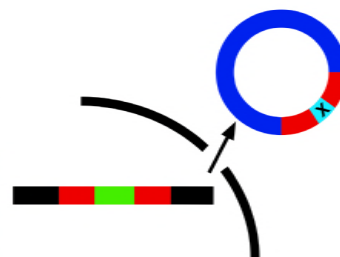

Figure 2

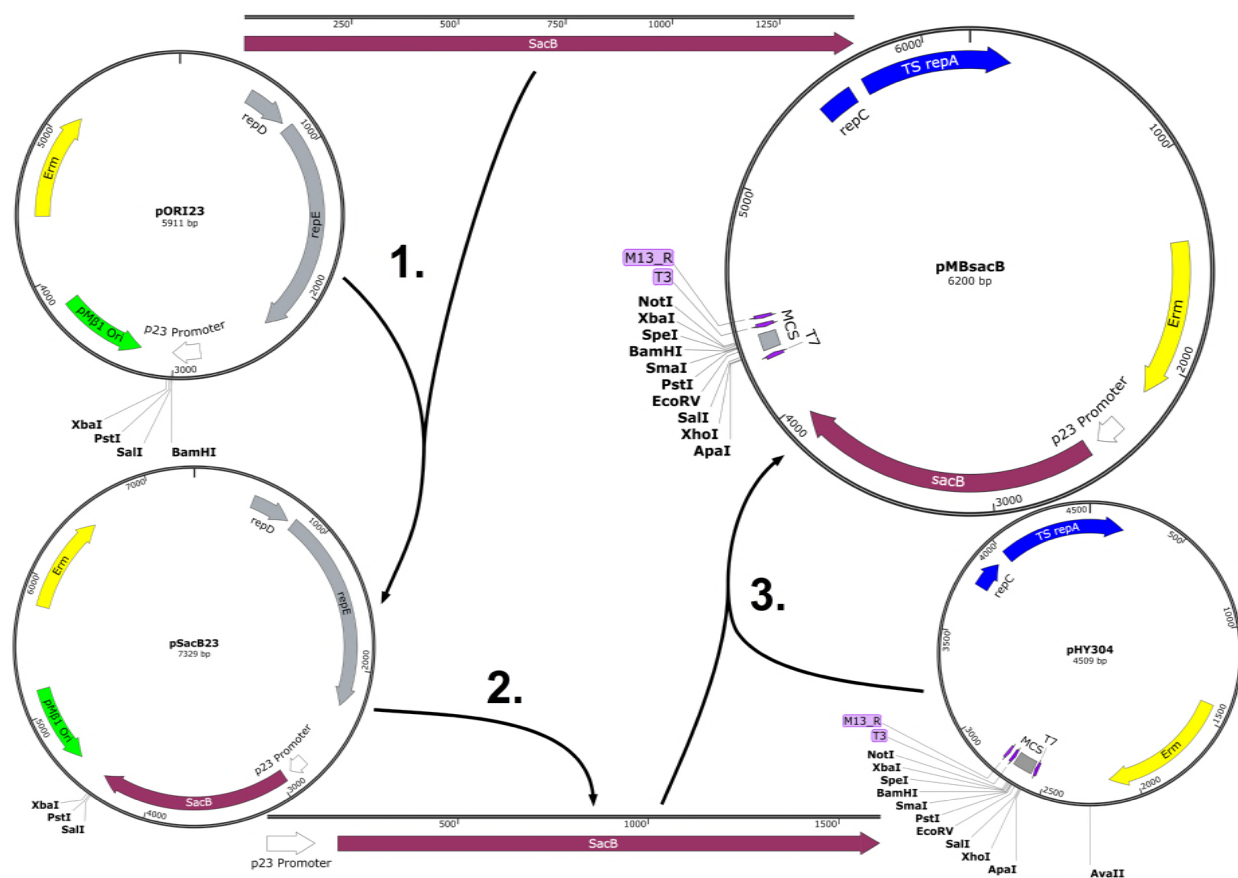

Figure 3

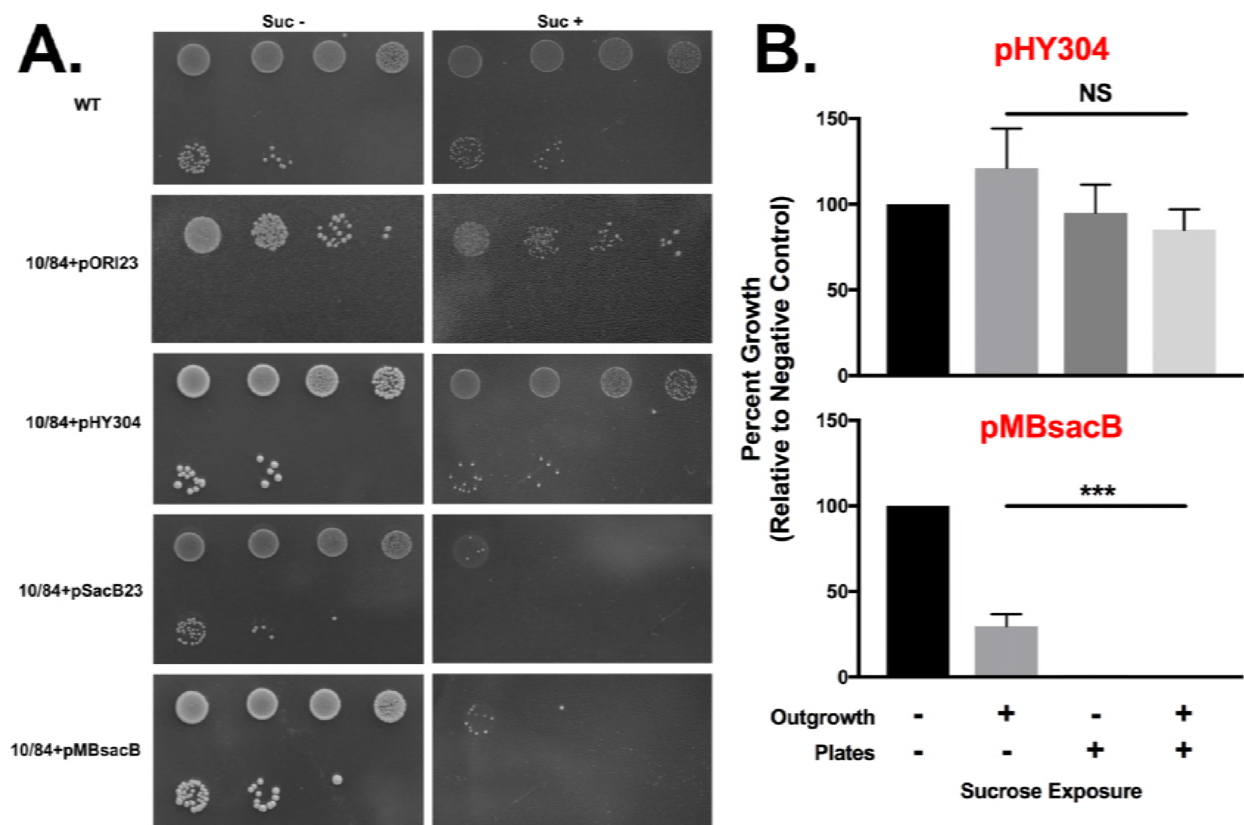

**Figure 4**

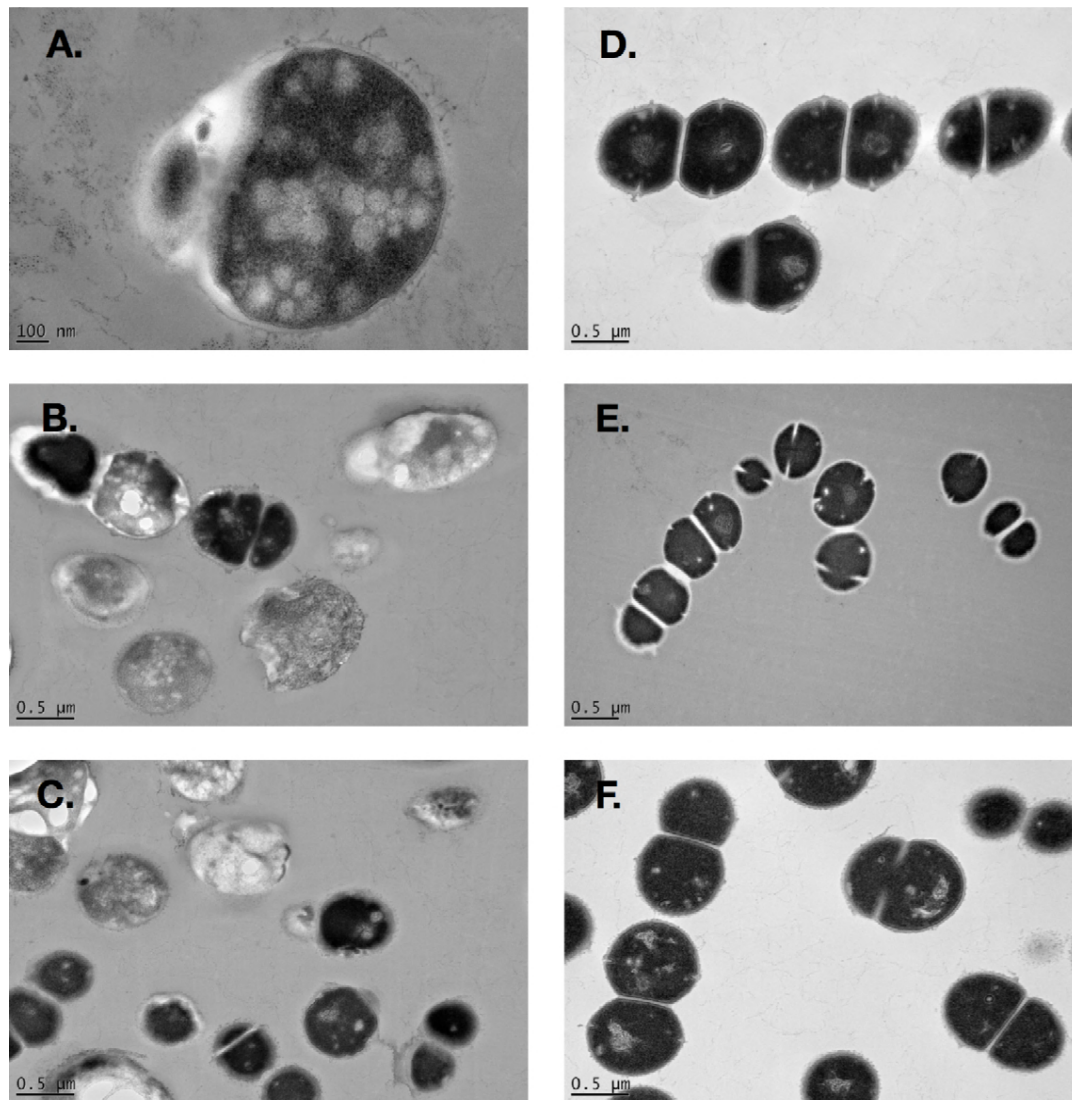

Figure 5

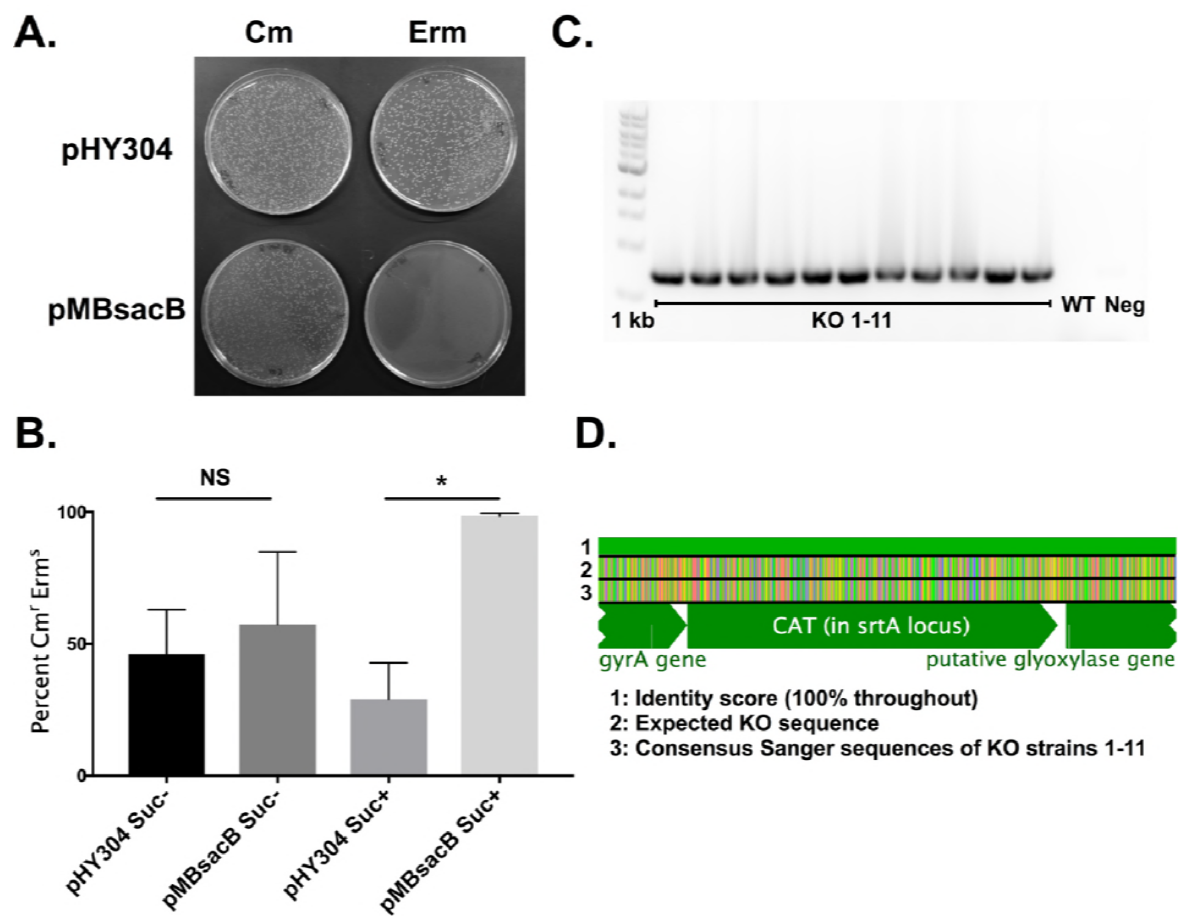



Figure 6

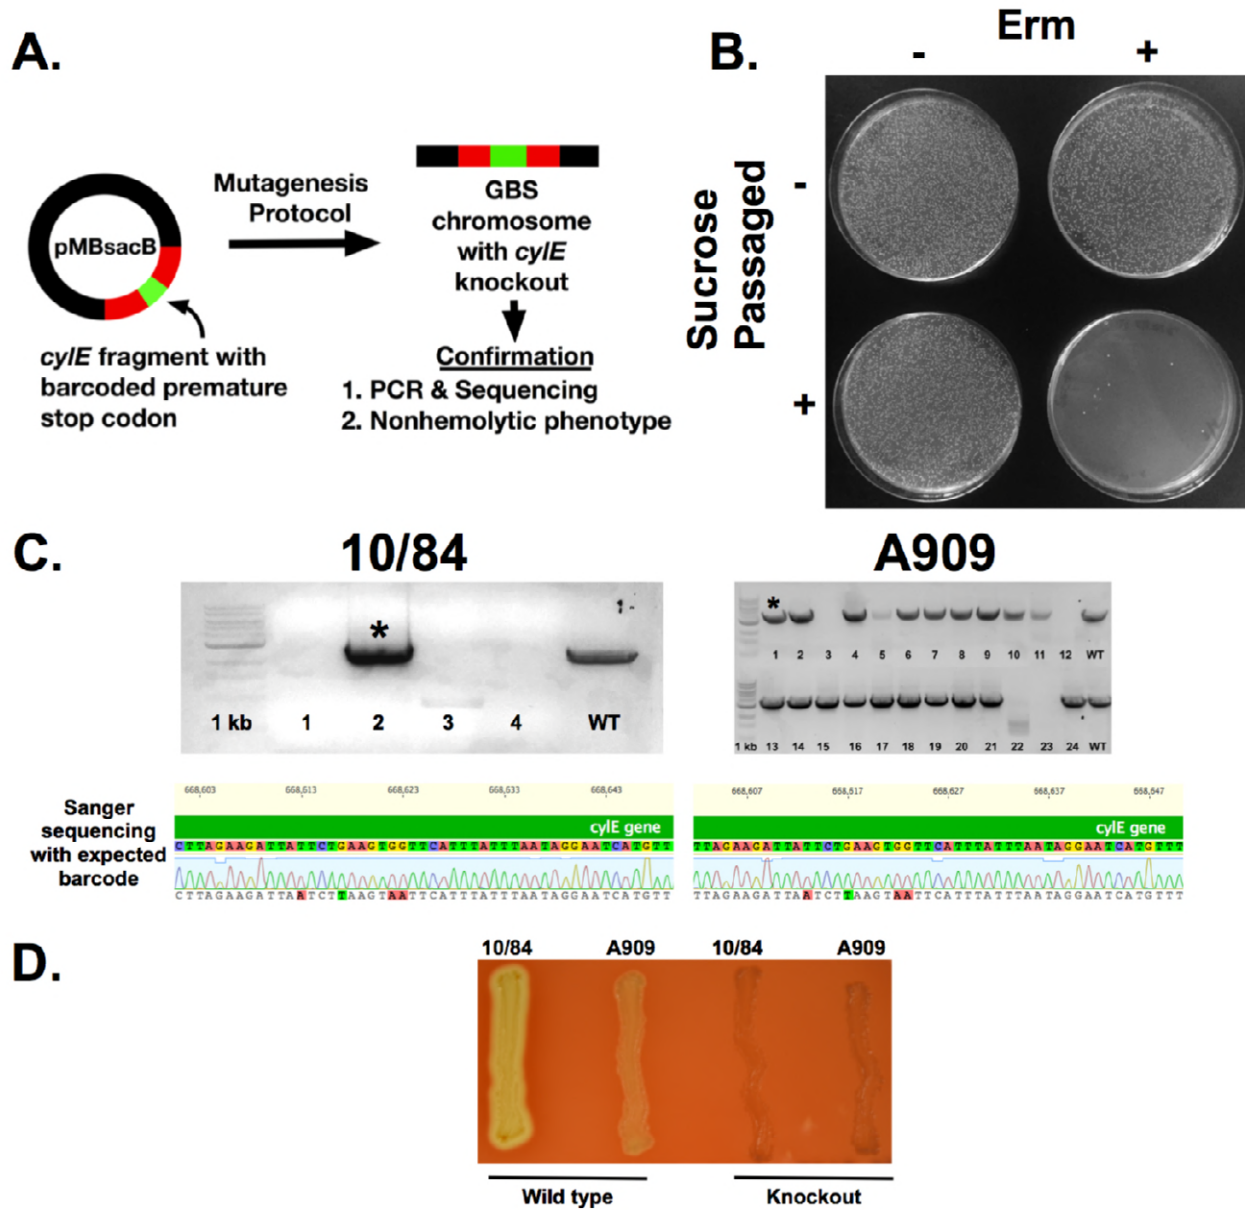

Source: https://www.biorxiv.org/content/10.1101/499822v1.full.pdf
